# Supplementary material for: Dendrobium fimbriatum Hook polysaccharide ameliorates dextran-sodium-sulfate-induced colitis in mice via improving intestinal barrier function, modulating intestinal microbiota, and reducing oxidative stress and inflammatory responses
Source: Royal Society of Chemistry journal article supplement (doi:10.1039/d1fo03003e), 2021-11-11
Supplement: d1fo03003e1.pdf [file d1fo03003e1.pdf]

## Supplementary information

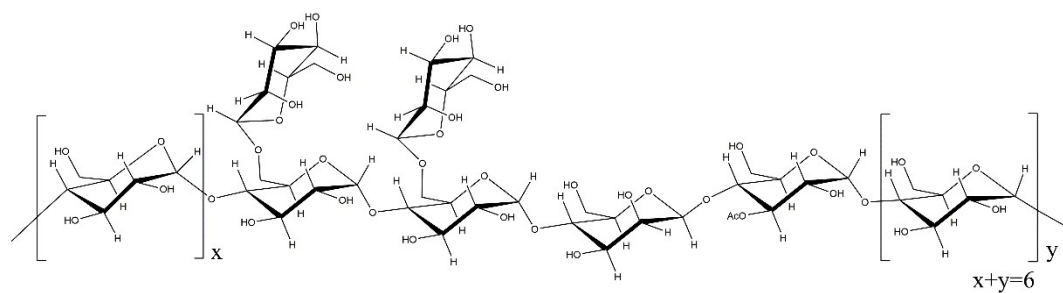

Fig. S1. The structure of cDFPW1<sup>20</sup>.

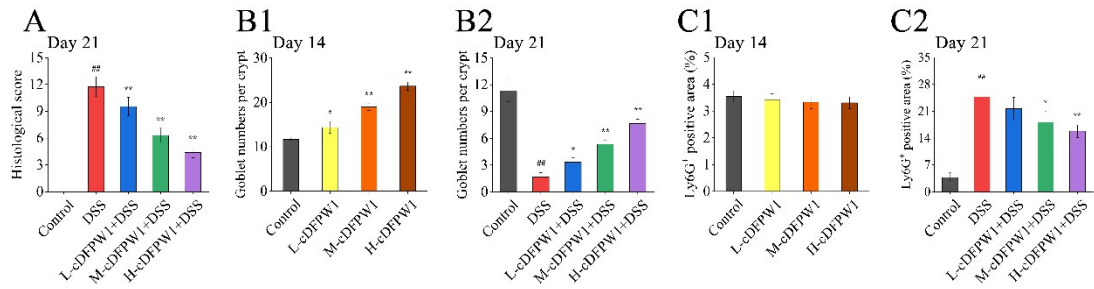

Fig. S2. cDFPW1 attenuated the colon tissue damage in DSS-induced colitis mice. Histological score in colon tissue (A), goblet number per crypt (B1, B2), Ly6G<sup>+</sup> positive area in colon tissues (C1, C2). Data are presented as mean  $\pm$  SEM (n = 3). \* $p$  < 0.05 and \*\* $p$  < 0.01 vs. control group on day 14. + $p$  < 0.05 and ++ $p$  < 0.01 vs. DSS-induced model group. # $p$  < 0.05 and ## $p$  < 0.01 vs. control group on day 21.

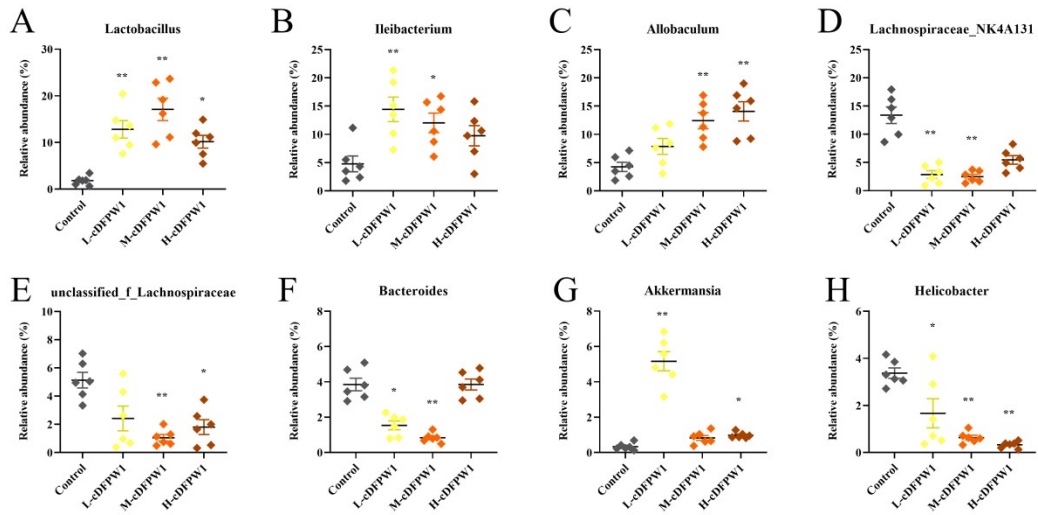

Fig. S3. Effects of cDFPW1 treatment for 14 days on specific gut microbiome at the genus level in mice. Data are presented as means  $\pm$  SEM (n = 6). \* $p < 0.05$  and \*\* $p < 0.01$  vs the control group.

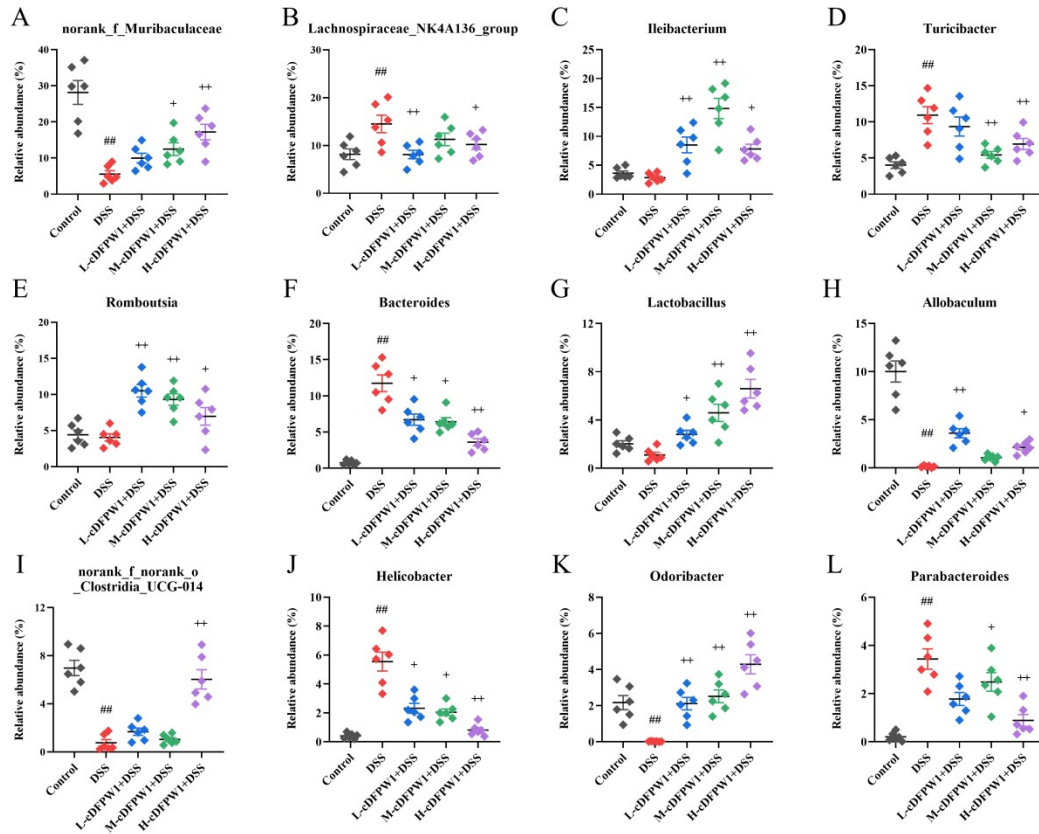

Fig. S4. Effects of cDFPW1 treatment for 21 days on specific gut microbiome at the genus level in DSS-induced mice. Data are presented as mean  $\pm$  SEM ( $n = 6$ ).  $+p < 0.05$  and  $++p < 0.01$  vs. DSS-induced model group.  $\#p < 0.05$  and  $##p < 0.01$  vs. control group on day 21.

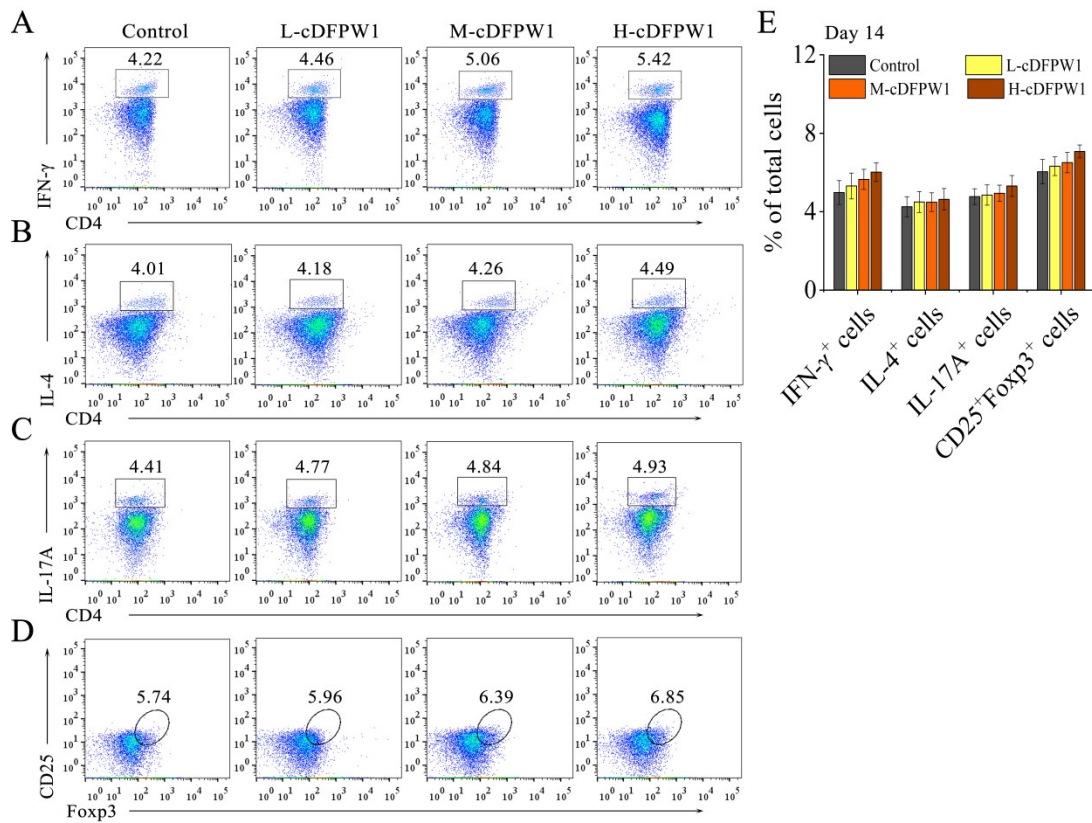

Fig. S5. Effects of cDFPW1 treatment for 14 days on Th1 (A), Th2 (B), Th17 (C) and Treg cells (D) in colonic lamina propria (LPs) were detected by using flow cytometry assay. Percentage of T-cell subpopulations gated on CD4<sup>+</sup> T cells (E). Data are presented as means  $\pm$  SEM (n = 3). \* $p$  < 0.05 and \*\* $p$  < 0.01 vs the control group.

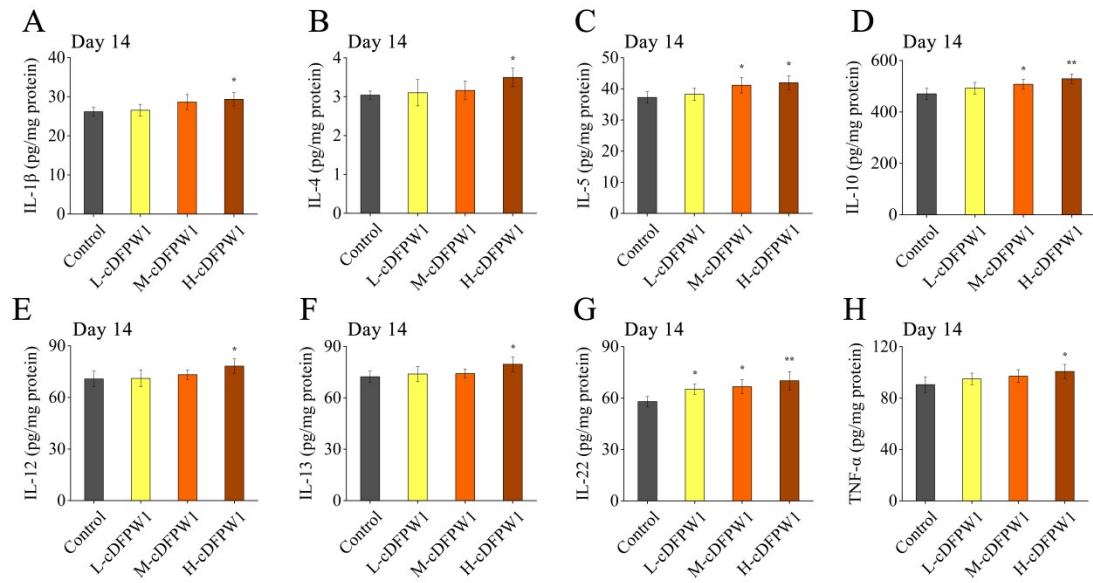

Fig. S6. Effects of cDFPW1 treatment for 14 days on inflammatory cytokines. IL-1 $\beta$  (A), IL-4 (B), IL-5 (C), IL-10 (D), IL-12 (E), IL-13 (F), IL-22 (G), TNF- $\alpha$  (H). Data are presented as means  $\pm$  SEM (n = 4). \* $p$  < 0.05 and \*\* $p$  < 0.01 vs the control group.

**Table S1.** Criteria for disease activity index (DAI) scoring in the DSS-induced colitis

| Score | Weight loss | Stool consistency     | Stool bleeding                |
|-------|-------------|-----------------------|-------------------------------|
| 0     | None        | Normal                | Negative hemocult             |
| 1     | 1-5%        | Soft but still formed | Negative hemocult             |
| 2     | 6-10%       | Soft                  | Positive hemocult             |
| 3     | 11-18%      | Very soft; wet        | Blood traces in stool visible |
| 4     | >18%        | Watery diarrhea       | Gross retal bleeding          |

Scoring criteria were recorded according to the literature's method<sup>10</sup>.

**Table S2.** The criteria for histopathological scoring

| Score | Inflammation                                                                                                          | Crypt damage                                                                  | Ulceration                             | Edema   |
|-------|-----------------------------------------------------------------------------------------------------------------------|-------------------------------------------------------------------------------|----------------------------------------|---------|
| 0     | No infiltrate                                                                                                         | None                                                                          | None                                   | None    |
| 1     | Occasional cell limited to submucosa                                                                                  | Some crypt damage, spaces between crypts                                      | Small, focal ulcers                    | Absent  |
| 2     | Significant presence of inflammatory cells in submucosa, limited to focal areas                                       | Larger spaces between crypts, loss of goblet cells, some shortening of crypts | Frequent small ulcers                  | Present |
| 3     | Infiltrate present in both submucosa and lamina propria, limited to focal areas                                       | Large areas without crypts, surrounded by normal crypts                       | Large areas lacking surface epithelium |         |
| 4     | Large amount of infiltrate in submucosa, lamina propria and surrounding blood vessels, covering large areas of mucosa | No crypts                                                                     |                                        |         |
| 5     | Transmural inflammation (mucosa to muscularis)                                                                        |                                                                               |                                        |         |

Scoring criteria were recorded according to the literature's method<sup>24</sup>.



**Table S3.** Primers specific for RT-qPCR

| Gene ID | Gene     | Forward primer         | Reverse primer       |
|---------|----------|------------------------|----------------------|
| 18260   | Occludin | TTGAAAGTCCACCTCCTT     | CCGGATAAAAAGAGTACG   |
| 21872   | ZO-1     | ACCACCAACCCGAGAAG      | CAGGAGTCATGGACGCAC   |
| 14433   | GAPDH    | GGTGAAGGTCGGTGTGAAAACG | CTCGCTCCTGGAAGATGGTG |
